# Supplementary material
Source: bioRxiv or medRxiv preprint supplement (https://www.biorxiv.org/highwire/filestream/134117/field_highwire_adjunct_files/13/444521-7.pdf)
Supplement: Supplementary file [file 444521-7.pdf]

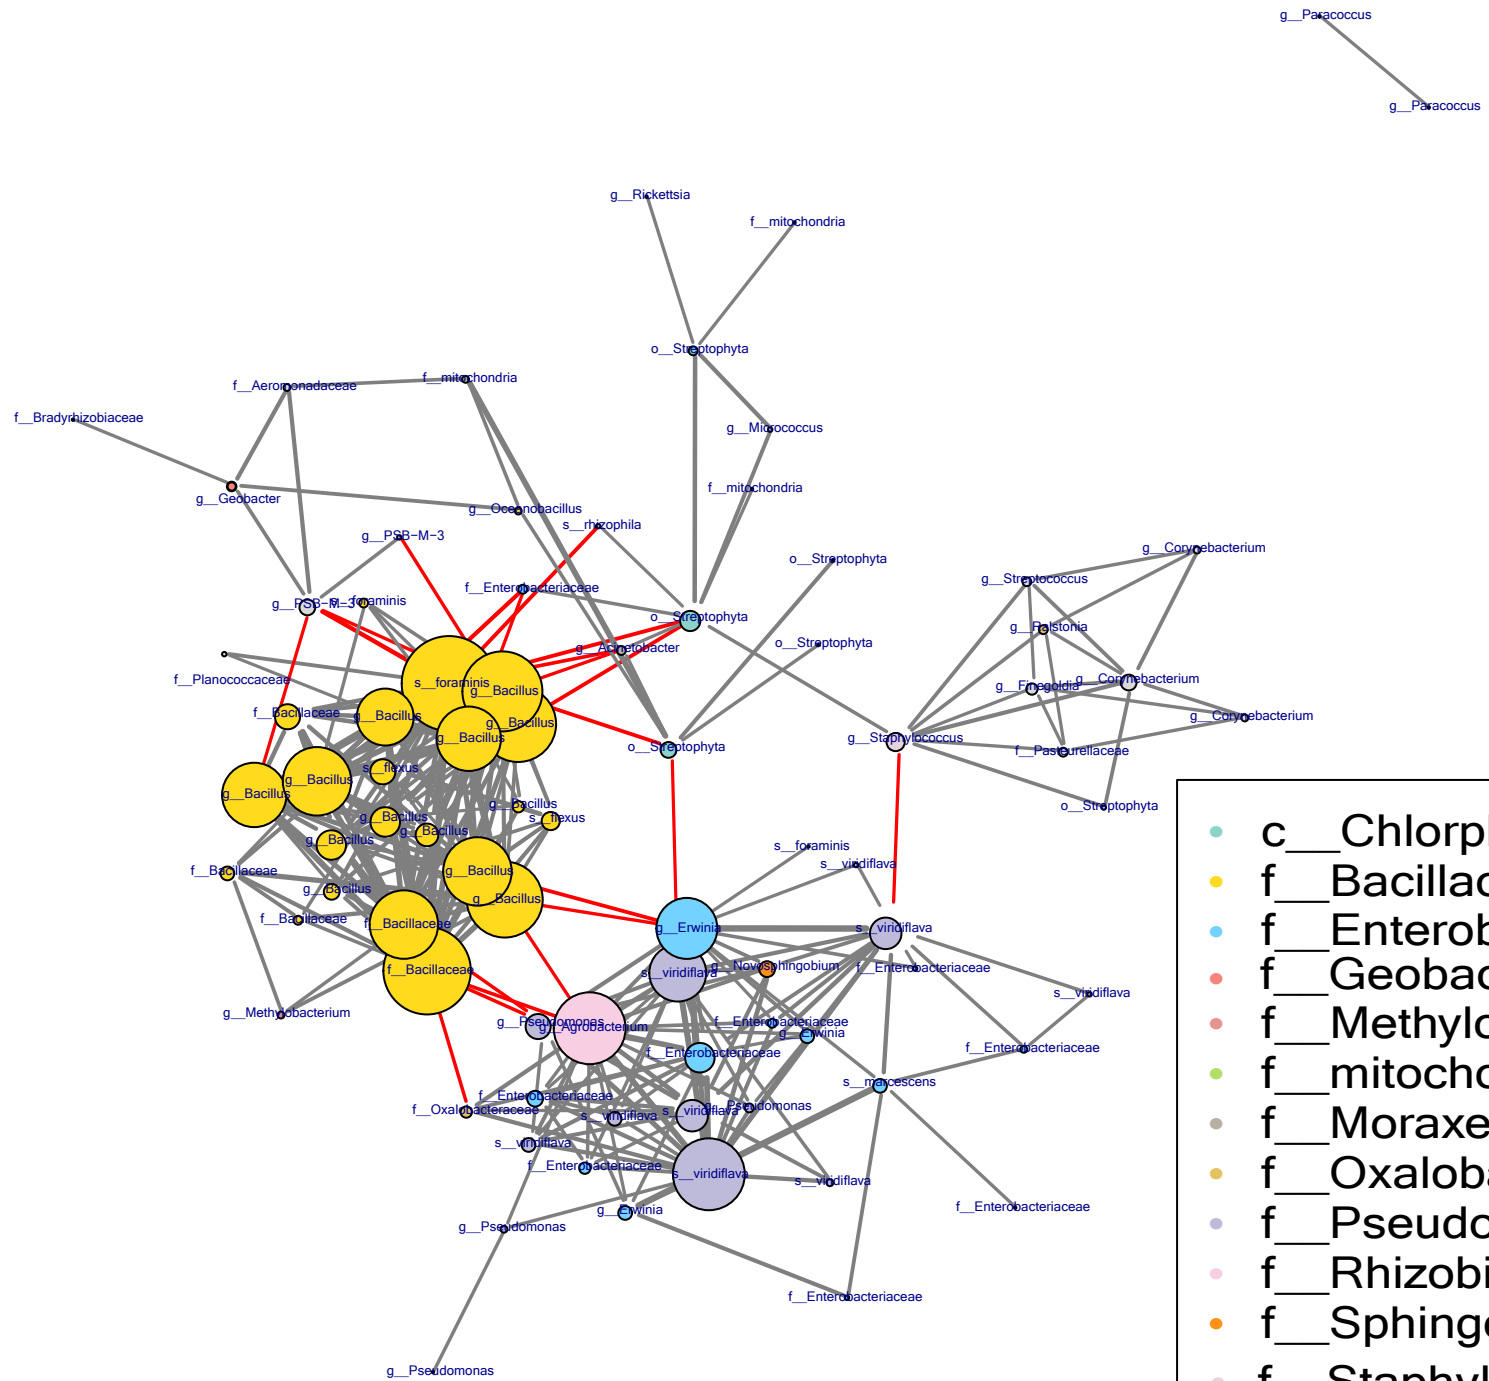

- c\_\_Chlorplast
- f\_\_Bacillaceae
- f\_\_Enterobacteriaceae
- f\_\_Geobacteraceae
- f\_\_Methylobacteriaceae
- f\_\_mitochondria
- f\_\_Moraxellaceae
- f\_\_Oxalobacteraceae
- f\_\_Pseudomonadaceae
- f\_\_Rhizobiaceae
- f\_\_Sphingomonadaceae
- f\_\_Staphylococcaceae
- f\_\_Others
